# Supplementary material for: UAV LiDAR surveys and machine learning improves snow depth and water equivalent estimates in the boreal landscapes
Source: Copernicus journal article supplement (doi:10.5194/egusphere-2025-1297), 2025-05-05
Supplement: Supplementary file 1 [file egusphere-2025-1297-supplement.pdf]

Supplement of

# UAV LiDAR surveys and machine learning improves snow depth and water equivalent estimates in the boreal landscapes

Maiju Ylönen et al. 2025

5 Correspondence to: Maiju Ylönen (Maiju.ylonen@oulu.fi)

Table S1. The UAV flight parameters from the field campaigns.

| Flight parameters             |                                                                                  | Equipment settings          |                 |
|-------------------------------|----------------------------------------------------------------------------------|-----------------------------|-----------------|
| Speed                         | 7 m/s                                                                            | Wavelength                  | 905 nm          |
| Altitude                      | 80 m                                                                             | Laser pulse repetition rate | 240 Hz          |
| Distance between flight lines |                                                                                  | Accuracy (50 m nadir)       | 3 cm            |
| Ground overlap (%)            | 70 %                                                                             | Return type                 | Up to 3 returns |
| Point density                 | 463.4 points/m <sup>2</sup> (Sodankylä)<br>244.18 points/m <sup>2</sup> (Pallas) |                             |                 |

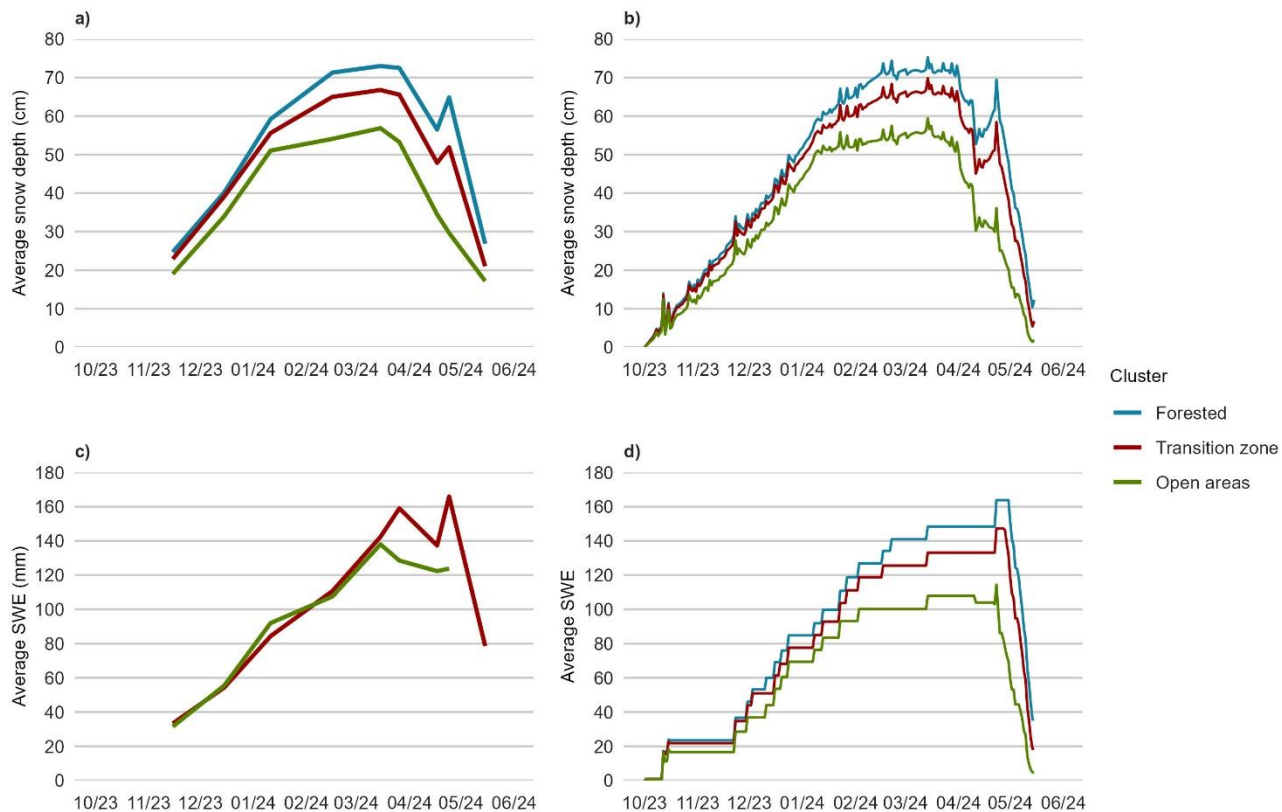

**Figure S1. Sodankylä snow course measurements and model outputs for different clusters. Snow depth from snow course (a) and model (b) and SWE from snow course (c) and model (d).**

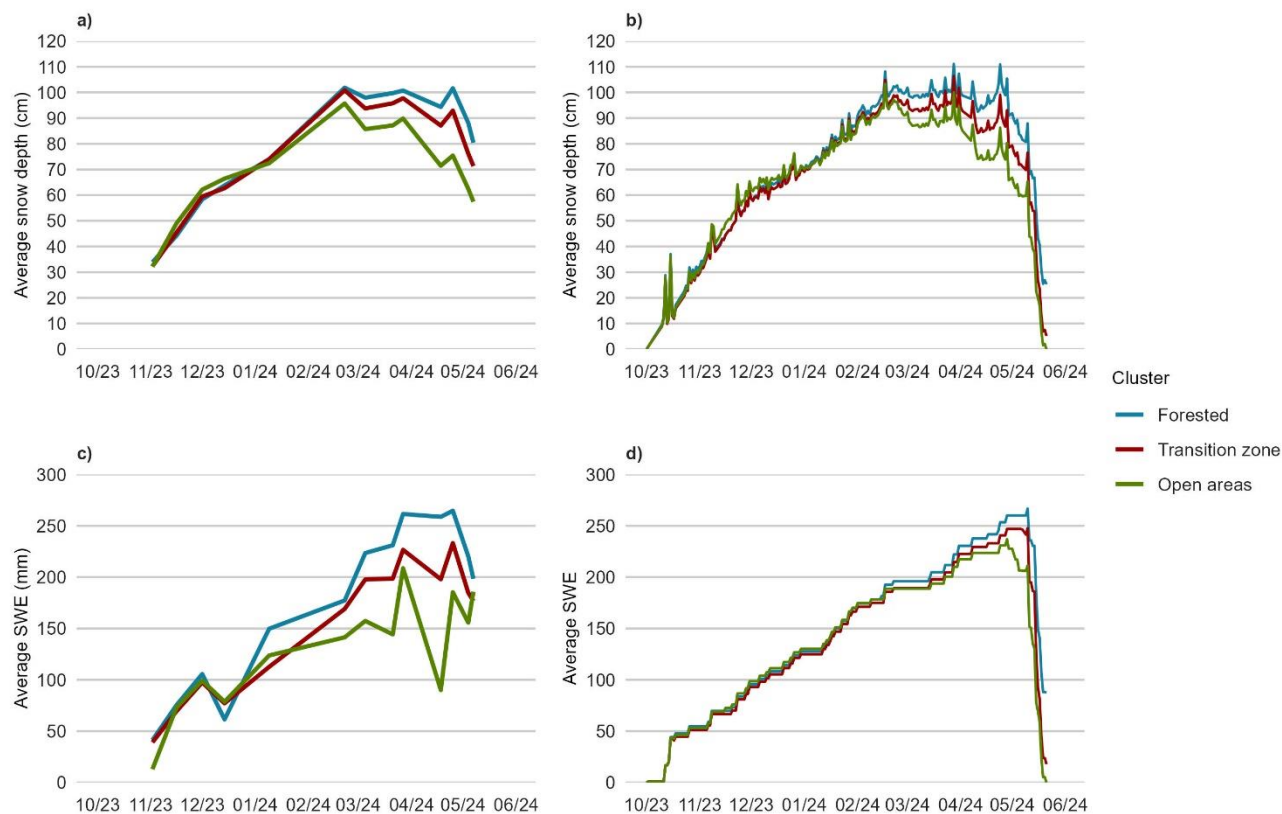

**Figure S2. Pallas snow course measurements and model outputs for different clusters. Snow depth from snow course (a) and model (b) and SWE from snow course (c) and model (d).**

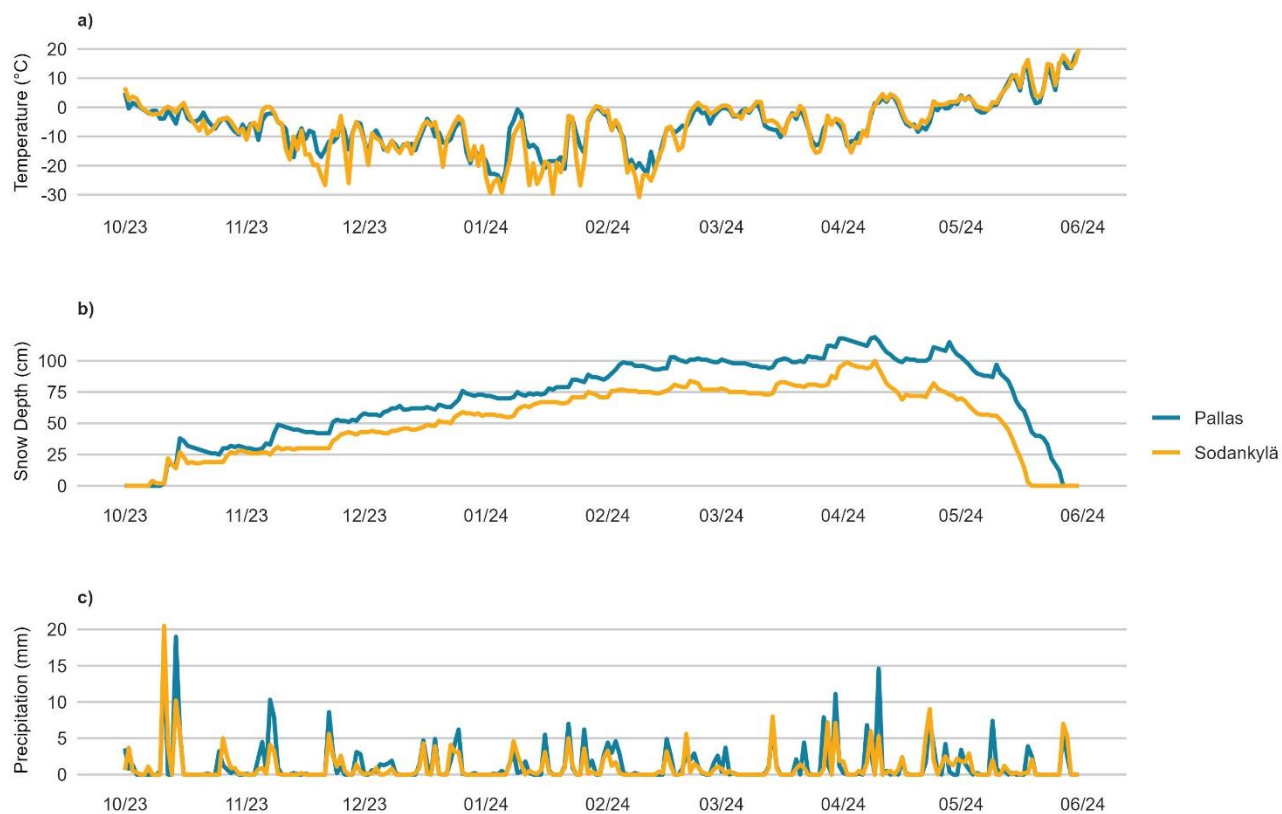

**Figure S3. Daily weather data from both sites during the field season 2023-2024. Upmost average temperature (a), snow depth (b), and precipitation (c). Data: FMI.**
